# Supplementary material
Source: PubMed Central journal article supplement (PMC5053104)
Supplement: NIHMS819592-supplement-supplemental.pdf [file NIHMS819592-supplement-supplemental.pdf]

## Supporting information

### Activation mechanism of the *Bacteroides fragilis* cysteine peptidase, Fragipain

Julien Herrou, Vivian M. Choi, Juliane Bubeck Wardenburg and Sean Crosson.

**Table S1:** primers

| Primer                | Sequence                                | Comment                                                                                                              |
|-----------------------|-----------------------------------------|----------------------------------------------------------------------------------------------------------------------|
| R147A-UP              | GCAAAGACAG <b>GCT</b> TGGTTTGGT         | Primers used to mutate residue R147 present in the cleavage site to alanine.                                         |
| R147A-LO              | ACCAAACCA <b>AGCT</b> GTCTTTGC          |                                                                                                                      |
| R147K-UP              | GCAAAGACAA <b>AAG</b> TGGTTTGGT         | Primers used to mutate residue R147 present in the cleavage site to lysine.                                          |
| R147K-LO              | ACCAAACCA <b>CTT</b> GTCTTTGC           |                                                                                                                      |
| L $\Delta$ 5-UP       | GAGGGATGGATACCTCGTTGGTTTGGTCAG          | Primers used to delete 5 residues ( $\Delta$ S142-T146) in the cleavable loop.                                       |
| L $\Delta$ 5-LO       | CTGACCAAACCAACGAGGTATCCATCCCTC          |                                                                                                                      |
| L $\Delta$ 7-UP       | CACGGTGAGGGATGGCGTTGGTTTGGTCAG          | Primers used to delete 7 residues ( $\Delta$ I140-T146) in the cleavable loop.                                       |
| L $\Delta$ 7-LO       | CTGACCAAACCAACGCCATCCCTCACCGTG          |                                                                                                                      |
| L $\Delta$ 7+R147A-UP | CACGGTGAGGGATGG <b>GCA</b> TGGTTTGGTCAG | Primers used to delete 7 residues ( $\Delta$ I140-T146) in the cleavable loop and to mutate residue R147 to alanine. |
| L $\Delta$ 7+R147A-LO | CTGACCAAACCA <b>TGCC</b> CATCCCTCACCGTG |                                                                                                                      |

**Table S2: strains**

| Strain # | Organism                           | Genetic background | Plasmid                         | Comment                                                        | Reference                                                                                                                                                  |
|----------|------------------------------------|--------------------|---------------------------------|----------------------------------------------------------------|------------------------------------------------------------------------------------------------------------------------------------------------------------|
| FC2470   | <i>E. coli</i> Rosetta (DE3) PlysS | -                  | pET28- <i>fpn</i>               | Strains used to express wild-type Fpn.                         | Choi V. <i>et al.</i> (2016). Nature Medicine.                                                                                                             |
| FC2471   | <i>E. coli</i> Rosetta (DE3) PlysS | -                  | pET28- <i>fpn</i> (H135A+C180A) | Strains used to express Fpn (H135A+C180A) active site mutant.  |                                                                                                                                                            |
| FC2472   | <i>E. coli</i> Rosetta (DE3) PlysS | -                  | pET28- <i>fpn</i> (R147A)       | Strains used to express Fpn (R147A) cleavage site mutant.      | This work.                                                                                                                                                 |
| FC2473   | <i>E. coli</i> Rosetta (DE3) PlysS | -                  | pET28- <i>fpn</i> (R147K)       | Strains used to express Fpn (R147K) cleavage site mutant.      |                                                                                                                                                            |
| FC2474   | <i>E. coli</i> Rosetta (DE3) PlysS | -                  | pET28- <i>fpn</i> (LΔ5)         | Strains used to express Fpn (LΔ5) cleavable loop mutant.       |                                                                                                                                                            |
| FC2475   | <i>E. coli</i> Rosetta (DE3) PlysS | -                  | pET28- <i>fpn</i> (LΔ7)         | Strains used to express Fpn (LΔ7) cleavable loop mutant.       |                                                                                                                                                            |
| FC2476   | <i>E. coli</i> Rosetta (DE3) PlysS | -                  | pET28- <i>fpn</i> (LΔ7+R147A)   | Strains used to express Fpn (LΔ7+R147A) cleavable loop mutant. |                                                                                                                                                            |
| FC2477   | <i>E. coli</i> Rosetta (DE3) PlysS | -                  | pET28- <i>bft</i>               | Strains used to express BFT.                                   | Choi V. <i>et al.</i> (2016). Nature Medicine.                                                                                                             |
| -        | <i>B. fragilis</i>                 | Δ <i>fpn</i>       | -                               | Strain used for western-blot.                                  |                                                                                                                                                            |
| -        | <i>B. fragilis</i>                 | Δ <i>fpn</i>       | pAH2- <i>fpn</i>                | Strain used for western-blot.                                  | This work. See [Choi V. <i>et al.</i> (2016). Nature Medicine and Hecht A <i>et al.</i> (2016; in press). EMBO reports] for primer and method information. |
| -        | <i>B. fragilis</i>                 | Δ <i>fpn</i>       | pAH2- <i>fpn</i> (H135A+C180A)  | Strain used for western-blot.                                  |                                                                                                                                                            |
| -        | <i>B. fragilis</i>                 | Δ <i>fpn</i>       | pAH2- <i>fpn</i> (LΔ7)          | Strain used for western-blot.                                  |                                                                                                                                                            |

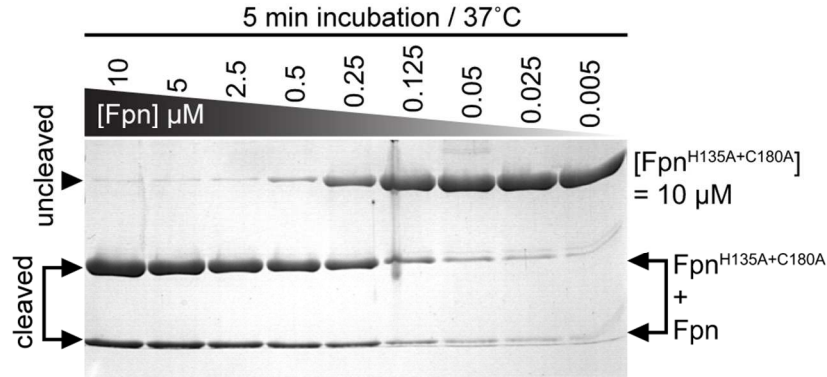

**Figure S1:** Concentration dependence of Fpn cleavage in *trans*. 10- $\mu$ l samples containing 10  $\mu$ M of inactive Fpn<sup>H135A+C180A</sup> and decreasing concentrations of wild-type Fpn (final concentrations tested: 10, 5, 2.5, 0.5, 0.25, 0.125, 0.05, 0.025 and 0.005  $\mu$ M) were incubated at 37°C for 5 minutes and resolved by SDS-PAGE.

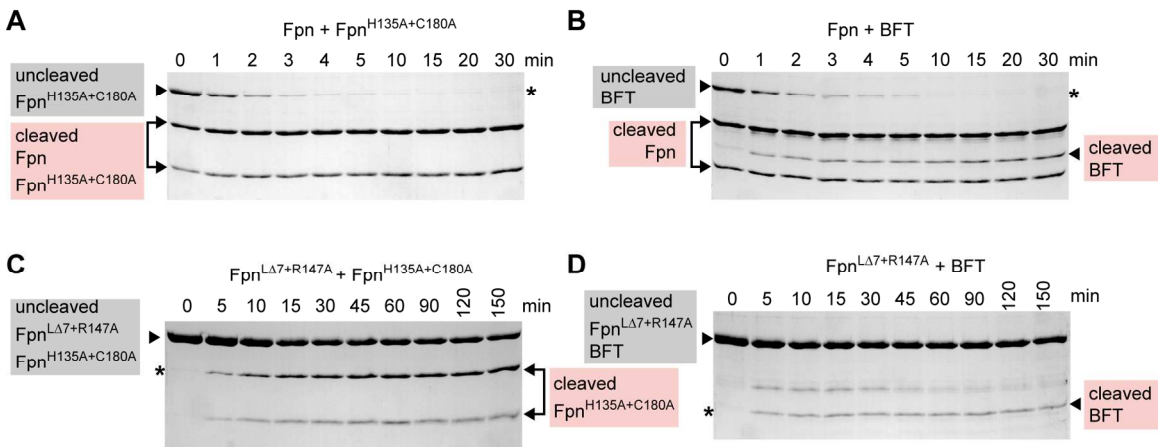

**Figure S2:** Time course of BFT or Fpn<sup>H135A+H180</sup> cleavage by wild-type Fpn or the loopless pro form Fpn mutant (Fpn<sup>Δ7+R147A</sup>). A) Digestion of Fpn active site mutant (Fpn<sup>H135A+H180</sup>) (5  $\mu$ M) by wild-type Fpn (5  $\mu$ M). B) Digestion of BFT (5  $\mu$ M) by wild-type Fpn (5  $\mu$ M). C) Digestion of Fpn<sup>H135A+H180</sup> (5  $\mu$ M) by loopless Fpn<sup>Δ7+R147A</sup> (5  $\mu$ M). D) Digestion of BFT (5  $\mu$ M) by Fpn<sup>Δ7+R147A</sup> (5  $\mu$ M). Bands quantified with imageJ are marked with a star.

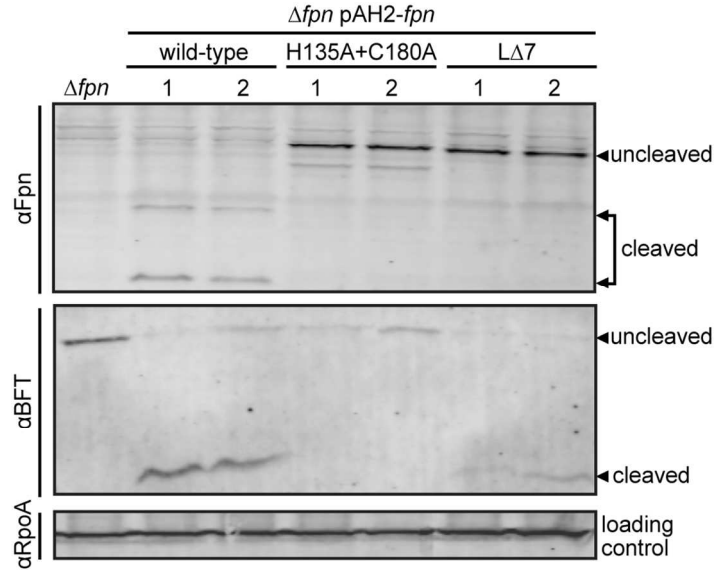

**Figure S3:** Western blot of *B. fragilis*  $\Delta fpn$  lysate ectopically expressing wild-type Fpn, Fpn<sup>H135A+C180A</sup> and Fpn<sup>L $\Delta$ 7</sup> proteins. Cell lysate supernatants were used to evaluate the ability of these proteins to auto-cleave (upper blot) and to process BFT (middle blot). RpoA protein (lower blot) was used as a loading control.
